# Supplementary material for: Effectiveness of a 2-dose varicella vaccination program in Changzhou, China, during the transitional period (2017-2022): a registry-based case-cohort study
Source: Research Square preprint supplement (doi:10.21203/rs.3.rs-4241764/v1), 2024-04-10
Supplement: Supplementary file 1 [file 89a0beff0bad4e4e097496d2.pdf]

Table 2. Comparison differences in Indicators of protective effect between subgroups in subcorhort and exclusion .

| Dataset   | Models                                            | Independent variables                  | subgroups  |           | Indicators of protective effect | P- value |
|-----------|---------------------------------------------------|----------------------------------------|------------|-----------|---------------------------------|----------|
| Subcohort | Cox proportional hazards model using IPW          | Model 1: Gender and Dose               | 0-dose vs. | 1-dose    | 82.54% (78.88%, 85.57%)         | <0.05    |
|           |                                                   |                                        |            | 2-dose    | 97.91% (96.91%, 98.59%)         |          |
|           |                                                   | Model 2: Gender and Type               | "N-N" vs.  | "O-N"     | 71.19% (63.54%, 77.17%)         | <0.05    |
|           |                                                   |                                        |            | "F-N"     | 89.78% (86.36%, 92.33%)         |          |
|           |                                                   |                                        |            | "O-F"     | 97.68% (96.61%, 98.45%)         |          |
|           |                                                   |                                        |            | "F-O"     | 99.66% (99.06%, 99.88%)         |          |
|           |                                                   |                                        |            | "O-O"     | 99.60% (99.20%, 99.80%)         |          |
|           |                                                   |                                        |            | "F-F"     | 99.70% (99.57%, 99.79%)         |          |
| Exclusion | Sensitivity analysis based on logistic regression | Model 3: Age, Gender, Area, and Dose   | 1-dose vs. | Intercept | -10.41                          | <0.05    |
|           |                                                   |                                        |            | 2-dose    | -2.43                           |          |
|           |                                                   | Model 4: Age, Gender, Area, and Type   | "O-N" vs.  | Intercept | -8.76                           | <0.05    |
|           |                                                   |                                        |            | "F-N"     | -1.67                           |          |
|           |                                                   |                                        |            | "F-F"     | -2.51                           |          |
|           |                                                   |                                        |            | "F-O"     | -4.12                           |          |
|           |                                                   |                                        |            | "O-F"     | -16.50                          | 0.973    |
|           |                                                   |                                        |            | "O-O"     | -16.11                          | 0.975    |
|           |                                                   | Model 5: Age, Gender, Area, and Reason | "L-N" vs.  | Intercept | -10.42                          | <0.05    |
|           |                                                   |                                        |            | "L-T"     | -2.30                           |          |
|           |                                                   |                                        |            | "E-N"     | -13.86                          |          |
|           |                                                   |                                        |            | "L-I"     | 26.31                           |          |
|           |                                                   |                                        |            | "T-I"     | 26.94                           |          |
|           |                                                   |                                        |            | "L-L"     | -14.89                          | 0.971    |
|           |                                                   |                                        |            | "T-L"     | -1.21                           | 0.231    |
|           |                                                   |                                        |            | "T-E"     | -14.15                          | 0.975    |
|           |                                                   |                                        |            | "E-L"     | -14.91                          | 0.999    |
|           |                                                   |                                        |            | "E-T"     | -14.43                          | 0.993    |
|           |                                                   |                                        |            | "E-E"     | -13.97                          | 0.997    |

IPW: inverse probability weighting; VE: vaccine effectiveness; OR: odds ratio; Dose: varicella vaccine dosage; Type: cost types for varicella vaccine; Area: children's residence in Changzhou districts and county; Reason: variable of the excluded part depends on the validity of the vaccination;
